# Supplementary material
Source: MDPI journal article supplement (https://www.mdpi.com/2076-3417/11/8/3539)
Supplement: s1 [file s1]

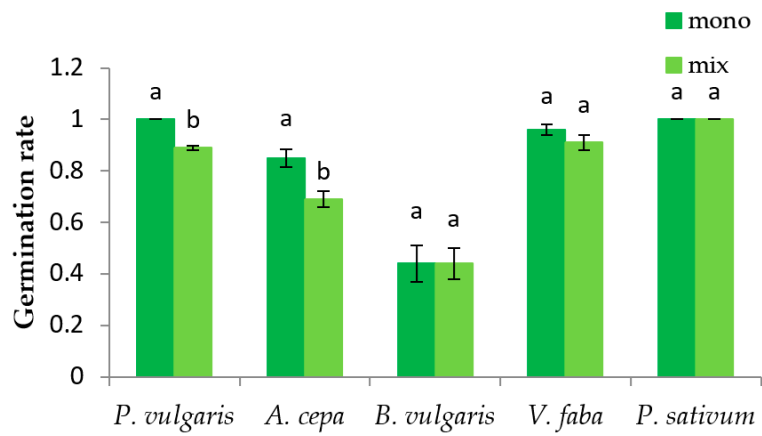

**Figure S1.** Germination rate of crop species grown with *P. oleracea* seeds (mono = only crop plant; mix = crop grown together with *P. oleracea*). Bars represent means of 4 replicates  $\pm$  SE. Bars topped by the same letter indicate no significant difference between treatments at the 5% level using Duncan's multiple-range test.

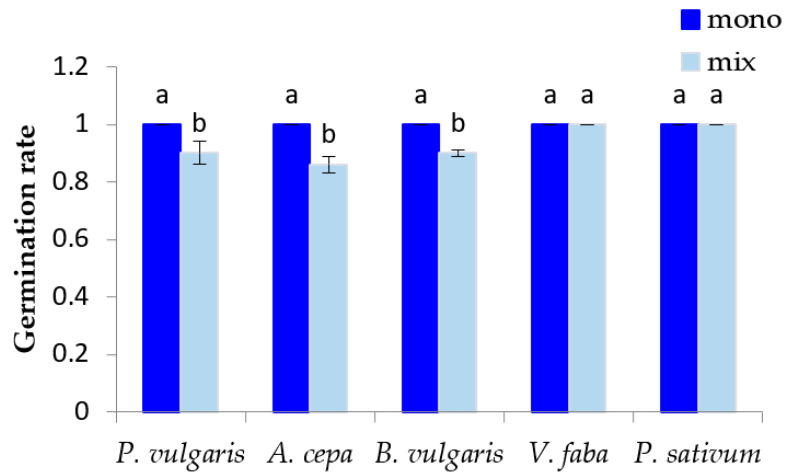

**Figure S2.** Germination rate of *P. oleracea* grown with crop seeds (mono = weed alone; mix = weed grown together with crop). Bars represent means of 4 replicates  $\pm$  SE. Bars topped by the same letter indicate no significant difference between treatments at the 5% level using Duncan's multiple-range test.

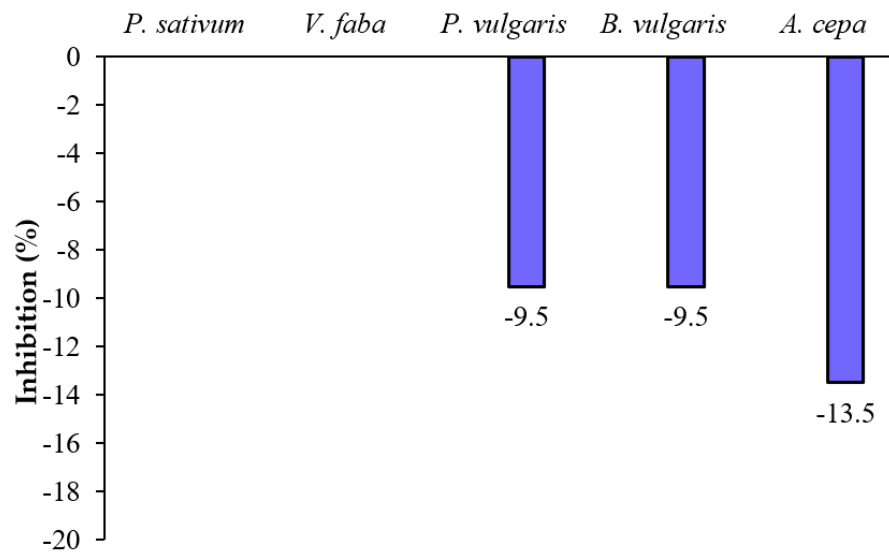

**Figure S3.** Inhibitory effects of crop seeds on germination percentage of *P. oleracea*.
